# Supplementary material for: Revisiting the type material of two African Diplozoinae (Diplozoidae: Monogenea), with remarks on morphology, systematics and diplozoid specificity
Source: PeerJ. 2024 Feb 28;12:e17020. doi: 10.7717/peerj.17020 (PMC10908257; doi:10.7717/peerj.17020)
Supplement: Supplemental Information 1 [file peerj-12-17020-s001.xlsx]

## Sheet: All P. ghanense data
	Paradiplozoon ghanense (Thomas, 1957)				Paradiplozoon ghanense (Thomas, 1957)				Paradiplozoon ghanense (Thomas, 1957)				Paradiplozoon ghanense (Thomas, 1957)				Lectotype	n	Paralectotype	n	Types	n	Voucher	n	Diporpa	n
	USNM 1367213				USNM 1548457				RMCA_VERMES_35512				RMCA_VERMES_35512
Alternate	USNPC # 071636				USNPC # 071636				M.T. 35.512				M.T. 35.512
Collection name	SNMNH				SNMNH				RMCA				RMCA
Previous collection	US National Parasite Collection				US National Parasite Collection				-				-
Recorded as	Diplozoon ghanense Thomas, 1957				Diplozoon ghanense Thomas, 1957				Diplozoon aegyptensis (Fischtal & Kuntz, 1963)				Diplozoon aegyptensis (Fischtal & Kuntz, 1963)
Status	Lectotype***				Paralectotype**				Voucher				Voucher
Specimen	1 Adult				1 Adult				1 Adult				1 Adult + 1 Diporpa
Collector	J.D. Thomas				J.D. Thomas				I. Paperna				I. Paperna
Identified by	J.H. Fischthal				J.H. Fischthal				-				-
Date collected	1956-04-01				1956-04-01				1973				1973
Date identified	1970				1970				1973				1973
Location	Black Volta River, Lawra Ghana				Black Volta River, Lawra Ghana				Lake Albert, Butiaba, Uganda				Lake Albert, Butiaba, Uganda
GPS	-				-				N 01° 8’ E 31° 32’				N 01° 8’ E 31° 32’
Site	-				-				Gills				Gills
Host family	Alestidae				Alestidae				Alestidae				Alestidae
Host	Brycinus macrolepidotus Valenciennes, 1850				Brycinus macrolepidotus Valenciennes, 1850				Brycinus macrolepidotus Valenciennes, 1850				Brycinus macrolepidotus Valenciennes, 1850
Recorded as	Alestes macrolepidotus (Valenciennes, 1850)				Alestes macrolepidotus (Valenciennes, 1850)				-				-
Record	Thomas (1957)				Thomas (1957)				Paperna (1979)				Paperna (1979)
Remarks	Corrosive acetate, Ehlrlich’s acid heamotoxylin, Mayer’s carmalum****				Corrosive acetate, Ehlrlich’s acid heamotoxylin, Mayer’s carmalum****				-				-
Total body length	3241.08	3582.99			4252.94	4121.94			2168	2542.38			1000.82				3408 (3241–3583)	2	4187 (4122–4253)	2	3777 (3241–4253)	4	2348 (2168–2542)	2	1001	1
Anterior length	1853.96	2097.25			2813.12	2567.47			1100.42	1323.55			537.01				1972 (1854–2097)	2	2687 (2567–2813)	2	2302 (1854–2813)	4	1207 (1100–1324)	2	537	1
Anterior width	676.64	636.47			753.6	715.6			451.01	411.48			287.51				656 (636–677)	2	734 (716–754)	2	694 (636–754)	4	431 (411–451)	2	288	1
Posterior length	623.73	691.07			596.15	755.3			560.19	667.25			463.89				657 (624–691)	2	671 (596–755)	2	664 (596–755)	4	611 (560–667)	2	464	1
Posterior width	151.31	92.89			225.69	109.4			207.66	139.51			200.94				119 (92.9–151)	2	157 (109–226)	2	136 (93–226)	4	170 (140–208)	2	201	1
Clamps length	97.26				94.84				65.73				45.39				97 (80.4–106)	14	94.7 (82.4–104)	14	95.8 (80.4–106)	28	65.6 (59.5–75)	16	45.2 (39.7–51.4)	8
Clamps width	150.7				130.72				94.77				66.63				150 (132–162)	14	130 (104.8–155)	14	140 (105–162)	28	94.5 (84.2–107)	16	66.5 (61.6–73.8)	8
Hook length	21.04	21.3				21.88	21.67		21.17	21.74	21.81	22.05	20.6	21.05			21.2 (21–21.3)	2	21.8 (21.7–21.9)	2	21.5 (21–21.9)	4	21.7 (21.2–22.1)	4	20.8 (20.6–21.1)	2
Handle	39.38	39.1				42.63			38.55	40.53	42.03	41.63	-	41.68			39.2 (39.1–39.4)	2	42.6	1	40.3 (39.1–42.6)	3	40.7 (38.6–42)	4	41.7	1
Haptor length	325.08	435.64			661.23	508.78			497.48	571.13			271.7				376 (325–436)	2	580 (509–661)	2	467 (325–661)	4	533 (497–571)	2	272	1
Haptor width	569.21	602.16			480.98	361.56			339.65	331.81			285.29				585 (569–602)	2	417 (362–481)	2	494 (362–602)	4	336 (332–340)	2	285	1
Fusion Region length	624.88				507.68				428.35				-				625	1	508	1	563 (508–625)	2	428.4	1		0
Fusion Region width	925.03				976.85				639.43				-				925	1	977	1	951 (925–977)	2	639.4	1	-	0
Space between suckers	19.67		17.17		21.24		29.34		23.67		5.05		11.45				18.4 (17.2–19.7)	2	25 (21.2–29.3)	2	21.4 (17.2–29.3)	4	10.9 (5.1–23.7)	2	11.5	1
Sucker length	56.28	57.45	60.04	62.47	64.53	68.53	64.7	66.91	45.83	45.33	51.96	51.57	56.06	54.45			59 (56.3–62.5)	4	66.1 (64.5–68.5)	4	62.5 (56.3–68.5)	8	48.6 (45.3–52)	4	55.2 (54.5–56.1)	2
Sucker width	58.76	57.44	54.3	52.96	65.33	67.88	53.15	52.93	57.36	57	54.83	54.16	53.4	53.79			55.8 (53–58.8)	4	59.4 (52.9–67.9)	4	57.6 (52.9–67.9)	8	55.8 (54.2–57.4)	4	53.6 (53.4–53.8)	2
Sucker to anterior	14.57		28.82		32.75		28.11		16.18		26.32		28.37				20.5 (14.6–28.8)	2	30.3 (28.1–32.8)	2	24.9 (14.6–32.8)	4	20.6 (16.2–26.3)	2	28.4	1
Pharynx length	62.87		48.27		65.17		45.42		60.45		54.16		59.89				55.1 (48.3–62.9)	2	54.4 (45.4–65.2)	2	54.7 (45.4–65.2)	4	57.2 (54.2–60.5)	2	59.9	1
Pharynx width	44.6		37.95		45.36		44.96		47.7		45.77		48.22				41.1 (38–44.6)	2	45.2 (45–45.4)	2	43.1 (38–45.4)	4	46.7 (45.8–47.7)	2	48.2	1
Prepharynx length	18.54		15.8		31.76		29.78		33.14		25.64		20.55				17.1 (15.8–18.5)	2	30.8 (29.8–31.8)	2	22.9 (15.8–31.8)	4	29.1 (25.6–33.1)	2	20.6	1
Egg length	258.48				-				-				-				258	1	-	0	258	1	-	0	-	0
Egg W	114.33				-				-				-				114	1	-	0	114	1	-	0	-	0
Anoperculum	167.24				-				-				-				167	1	-	0	167	1	-	0	-	0
Testes length	151.58				128.73	122.96			86.84	82.08			-				152 (152–152)	1	126 (123–129)	2	134 (123–152)	3	84.4 (82.1–86.8)	2	-	0
Testes width	123.13				116.85	115.47			70.28	82.85			-				123 (123–123)	1	116 (115–117)	2	118 (115–123)	3	76.3 (70.3–82.9)	2	-	0
Ovary length	193.43				394.79	291.54			-				-				193 (193–193)	1	339 (292–395)	2	281 (193–395)	3		0	-	0
Ovary width	327.17				178.13	215.97			-				-				327 (327–327)	1	196 (178–216)	2	233 (178–327)	3		0	-	0
Clamp 1 length	95.05	90.49			102.17	91.87	94.49	92.99	63.7	63.27	70.98	71.04	51.35	51.23			92.7 (90.5–95.1)	2	95.3 (91.9–102.2)	4	94.4 (90.5–102)	6	67.1 (63.3–71)	4	51.3 (51.2–51.4)	2
Clamp 1 width	133.54	132.25			137.81	128.35	116.69	104.83	84.2	84.54	94.09	94.56	65.02	63.45			133 (132–134)	2	121.3 (104.8–137.8)	4	125 (105–138)	6	89.2 (84.2–94.6)	4	64.2 (63.5–65)	2
Clamp 2 length	100.75	100.26	103.88	97.72			103.26	93.34	61.22	64.8	74.94	69.9	47.74	43.57			101 (97.7–104)	4	98.2 (93.3–103.3)	2	100 (93.3–104)	6	67.5 (61.2–74.9)	4	45.6 (43.6–47.7)	2
Clamp 2 width	157.56	162.04	157.6	142.74			124.01	123.16	97.69	94.92	107.24	105.15	69.81	73.75			155 (143–162)	4	123.6 (123.2–124)	2	144 (123–162)	6	101 (94.9–107)	4	71.8 (69.8–73.8)	2
Clamp 3 length	93.22	102.12	105.59	105.75	103.61	87.62	91.06	94.28	59.93	64.18	68.86	67.87	42.47	42.3			102 (93.2–106)	4	94 (87.6–103.6)	4	97.7 (87.6–106)	8	65.1 (59.9–68.9)	4	42.4 (42.3–42.5)	2
Clamp 3 width	154.31	157.26	158.45	152.15	148.88	154.8	125.87	129.39	93.52	91.6	103.23	104.566	65.67	69.62			156 (152–158)	4	139.2 (125.9–154.8)	4	147 (126–158)	8	98.1 (91.6–105)	4	67.6 (65.7–69.6)	2
Clamp 4 length	91.16	97.23	80.35	98.04	82.44	96.62	96.62	97.36	60.43	59.52	66.66	64.4	44.77	39.72			91.4 (80.4–98)	4	93 (82.4–97.4)	4	92.2 (80.4–98)	8	62.7 (59.5–66.7)	4	42.2 (39.7–44.8)	2
Clamp 4 width	148.27	161.84	142.48	149.34	136.67	152.42	125.47	121.68	94.25	88.62	88.47	89.71	61.62	64.07			150 (142–162)	4	133.5 (121.7–152.4)	4	142 (122–162)	8	90.2 (88.5–94.3)	4	62.8 (61.6–64.1)	2

## Sheet: USNM 1367213
	Paradiplozoon ghanense (Thomas, 1957)
	USNM 1367213
Alternate	USNPC # 071636
Collection name	SNMNH
Previous collection	US National Parasite Collection
Recorded as	Diplozoon ghanense Thomas, 1957
Status	Lectotype***
Specimen	1 Adult
Collector	J.D. Thomas
Identified by	J.H. Fischthal
Date collected	1956-04-01
Date identified	1970
Location	Black Volta River, Lawra Ghana
GPS	-
Site	-
Host family	Alestidae
Host	Brycinus macrolepidotus Valenciennes, 1850
Recorded as	Alestes macrolepidotus (Valenciennes, 1850)
Record	Thomas (1957)
Remarks	Corrosive acetate, Ehlrlich’s acid heamotoxylin, Mayer’s carmalum****
Total body length	3241.08	3582.99
Anterior length	1853.96	2097.25
Anterior width	676.64	636.47
Posterior length	623.73	691.07
Posterior width	151.31	92.89
Clamps length	90.77
Clamps width	140.66
Hook length	21.04	21.3
Handle	39.38	39.1
Haptor length	325.08	435.64
Haptor width	569.21	602.16
Fusion Region length	624.88
Fusion Region width	925.03
Space between suckers	19.67		17.17
Sucker length	56.28	57.45	60.04	62.47
Sucker width	58.76	57.44	54.3	52.96
Sucker to anterior	14.57		28.82
Pharynx length	62.87		48.27
Pharynx width	44.6		37.95
Prepharynx length	18.54		15.8
Egg length	258.48
Egg W	114.33
Anoperculum	167.24
Testes length	151.58
Testes width	123.13
Ovary length	193.43
Ovary width	327.17
Clamp 1 length	95.05	90.49
Clamp 1 width	133.54	132.25
Clamp 2 length	100.75	100.26	103.88	97.72
Clamp 2 width	157.56	162.04	157.6	142.74
Clamp 3 length	93.22	102.12	105.59	105.75
Clamp 3 width	154.31	157.26	158.45	152.15
Clamp 4 length	91.16	97.23	80.35	98.04
Clamp 4 width	148.27	161.84	142.48	149.34

## Sheet: USNM 1548457
	Paradiplozoon ghanense (Thomas, 1957)
	USNM 1548457
Alternate	USNPC # 071636
Collection name	SNMNH
Previous collection	US National Parasite Collection
Recorded as	Diplozoon ghanense Thomas, 1957
Status	Paralectotype**
Specimen	1 Adult
Collector	J.D. Thomas
Identified by	J.H. Fischthal
Date collected	1956-04-01
Date identified	1970
Location	Black Volta River, Lawra Ghana
GPS	-
Site	-
Host family	Alestidae
Host	Brycinus macrolepidotus Valenciennes, 1850
Recorded as	Alestes macrolepidotus (Valenciennes, 1850)
Record	Thomas (1957)
Remarks	Corrosive acetate, Ehlrlich’s acid heamotoxylin, Mayer’s carmalum****
Total body length	4252.94	4121.94
Anterior length	2813.12	2567.47
Anterior width	753.6	715.6
Posterior length	596.15	755.3
Posterior width	225.69	109.4
Clamps length	94.84
Clamps width	130.72
Hook length		21.88	21.67
Handle		42.63
Haptor length	661.23	508.78
Haptor width	480.98	361.56
Fusion Region length	507.68
Fusion Region width	976.85
Space between suckers	21.24		29.34
Sucker length	64.53	68.53	64.7	66.91
Sucker width	65.33	67.88	53.15	52.93
Sucker to anterior	32.75		28.11
Pharynx length	65.17		45.42
Pharynx width	45.36		44.96
Prepharynx length	31.76		29.78
Egg length	-
Egg W	-
Anoperculum	-
Testes length	128.73	122.96
Testes width	116.85	115.47
Ovary length	394.79	291.54
Ovary width	178.13	215.97
Clamp 1 length	102.17	91.87	94.49	92.99
Clamp 1 width	137.81	128.35	116.69	104.83
Clamp 2 length			103.26	93.34
Clamp 2 width			124.01	123.16
Clamp 3 length	103.61	87.62	91.06	94.28
Clamp 3 width	148.88	154.8	125.87	129.39
Clamp 4 length	82.44	96.62	96.62	97.36
Clamp 4 width	136.67	152.42	125.47	121.68

## Sheet: RMCA_VERMES_35512 Adult
	Paradiplozoon ghanense (Thomas, 1957)
	RMCA_VERMES_35512
Alternate	M.T. 35.512
Collection name	RMCA
Previous collection	-
Recorded as	Diplozoon aegyptensis (Fischtal & Kuntz, 1963)
Status	Voucher
Specimen	1 Adult
Collector	I. Paperna
Identified by	-
Date collected	1973
Date identified	1973
Location	Lake Albert, Butiaba, Uganda
GPS	N 01° 8’ E 31° 32’
Site	Gills
Host family	Alestidae
Host	Brycinus macrolepidotus Valenciennes, 1850
Recorded as	-
Record	Paperna (1979)
Remarks	-
Total body length	2168	2542.38
Anterior length	1100.42	1323.55
Anterior width	451.01	411.48
Posterior length	560.19	667.25
Posterior width	207.66	139.51
Clamps length	65.73
Clamps width	94.77
Hook length	21.17	21.74	21.81	22.05
Handle	38.55	40.53	42.03	41.63
Haptor length	497.48	571.13
Haptor width	339.65	331.81
Fusion Region length	428.35
Fusion Region width	639.43
Space between suckers	23.67		5.05
Sucker length	45.83	45.33	51.96	51.57
Sucker width	57.36	57	54.83	54.16
Sucker to anterior	16.18		26.32
Pharynx length	60.45		54.16
Pharynx width	47.7		45.77
Prepharynx length	33.14		25.64
Egg length	-
Egg W	-
Anoperculum	-
Testes length	86.84	82.08
Testes width	70.28	82.85
Ovary length	-
Ovary width	-
Clamp 1 length	63.7	63.27	70.98	71.04
Clamp 1 width	84.2	84.54	94.09	94.56
Clamp 2 length	61.22	64.8	74.94	69.9
Clamp 2 width	97.69	94.92	107.24	105.15
Clamp 3 length	59.93	64.18	68.86	67.87
Clamp 3 width	93.52	91.6	103.23	104.566
Clamp 4 length	60.43	59.52	66.66	64.4
Clamp 4 width	94.25	88.62	88.47	89.71

## Sheet: RMCA_VERMES_35512 Diporpa
	Paradiplozoon ghanense (Thomas, 1957)
	RMCA_VERMES_35512
Alternate	M.T. 35.512
Collection name	RMCA
Previous collection	-
Recorded as	Diplozoon aegyptensis (Fischtal & Kuntz, 1963)
Status	Voucher
Specimen	1 Adult + 1 Diporpa
Collector	I. Paperna
Identified by	-
Date collected	1973
Date identified	1973
Location	Lake Albert, Butiaba, Uganda
GPS	N 01° 8’ E 31° 32’
Site	Gills
Host family	Alestidae
Host	Brycinus macrolepidotus Valenciennes, 1850
Recorded as	-
Record	Paperna (1979)
Remarks	-
Total body length	1000.82
Anterior length	537.01
Anterior width	287.51
Posterior length	463.89
Posterior width	200.94
Clamps length	45.39
Clamps width	66.63
Hook length	20.6	21.05
Handle	-	41.68
Haptor length	271.7
Haptor width	285.29
Fusion Region length	-
Fusion Region width	-
Space between suckers	11.45
Sucker length	56.06	54.45
Sucker width	53.4	53.79
Sucker to anterior	28.37
Pharynx length	59.89
Pharynx width	48.22
Prepharynx length	20.55
Egg length	-
Egg W	-
Anoperculum	-
Testes length	-
Testes width	-
Ovary length	-
Ovary width	-
Clamp 1 length	51.35	51.23
Clamp 1 width	65.02	63.45
Clamp 2 length	47.74	43.57
Clamp 2 width	69.81	73.75
Clamp 3 length	42.47	42.3
Clamp 3 width	65.67	69.62
Clamp 4 length	44.77	39.72
Clamp 4 width	61.62	64.07
