# Supplementary material for: Revisiting the type material of two African Diplozoinae (Diplozoidae: Monogenea), with remarks on morphology, systematics and diplozoid specificity
Source: PeerJ. 2024 Feb 28;12:e17020. doi: 10.7717/peerj.17020 (PMC10908257; doi:10.7717/peerj.17020)
Supplement: Supplemental Information 2 [file peerj-12-17020-s002.xlsx]

## Sheet: All P. aegyptense data
	Paradiplozoon aegyptense (Fischtal & Kuntz, 1963)				Paradiplozoon aegyptense (Fischtal & Kuntz, 1963)				Paradiplozoon aegyptense (Fischtal & Kuntz, 1963)				Paradiplozoon aegyptense (Fischtal & Kuntz, 1963)				Paradiplozoon aegyptense (Fischtal & Kuntz, 1963)				Paradiplozoon aegyptense (Fischtal & Kuntz, 1963)				Paradiplozoon aegyptense (Fischtal & Kuntz, 1963)				Paradiplozoon aegyptense (Fischtal & Kuntz, 1963)				Paradiplozoon aegyptense (Fischtal & Kuntz, 1963)				Paradiplozoon aegyptense (Fischtal & Kuntz, 1963)				Holotype	n	Paratypes	n	Types	n	Voucher	n
	USNM 1355449				USNM 1355450.1				USNM 1355450.2				USNM 1363700.1				USNM 1363700.2				USNM 1363700.3				USNM 1363700.4				USNM 1363700.5				RMCA_VERMES_35196				RMCA_VERMES_35580
Alternate	USNPC # 059653				USNPC # 059654				USNPC # 059654				USNPC # 068090				USNPC # 068090				USNPC # 068090				USNPC # 068090				USNPC # 068090				M.T. 35.196				M.T. 35.580
Collection name	SNMNH				SNMNH				SNMNH				SNMNH				SNMNH				SNMNH				SNMNH				SNMNH				RMCA				RMCA
Previous collection	US National Parasite Collection				US National Parasite Collection				US National Parasite Collection				US National Parasite Collection				US National Parasite Collection				US National Parasite Collection				US National Parasite Collection				US National Parasite Collection				-				-
Recorded as	Diplozoon aegyptensis Fischtal & Kuntz, 1963				Diplozoon aegyptensis Fischtal & Kuntz, 1963				Diplozoon aegyptensis Fischtal & Kuntz, 1963				Diplozoon aegyptensis Fischtal & Kuntz, 1963				Diplozoon aegyptensis Fischtal & Kuntz, 1963				Diplozoon aegyptensis Fischtal & Kuntz, 1963				Diplozoon aegyptensis Fischtal & Kuntz, 1963				Diplozoon aegyptensis Fischtal & Kuntz, 1963				Diplozoon aegyptensis (Fischtal & Kuntz, 1963)				Diplozoon aegyptensis (Fischtal & Kuntz, 1963)
Status	Holotype*				Paratypes				Paratypes				Paratypes				Paratypes				Paratypes				Paratypes				Paratypes				Paratype**				Voucher
Specimen	1 Adult				2 Adults				2 Adults				5 Adults				5 Adults				5 Adults				5 Adults				5 Adults				1 Adult				1 Adult (Damaged)
Collector	R.E. Kuntz				R.E. Kuntz				R.E. Kuntz				R.E. Kuntz				R.E. Kuntz				R.E. Kuntz				R.E. Kuntz				R.E. Kuntz				J.H. Fischthal				I. Paperna
Identified by	J.H. Fischthal & R.E. Kuntz				J.H. Fischthal & R.E. Kuntz				J.H. Fischthal & R.E. Kuntz				J.H. Fischthal & R.E. Kuntz				J.H. Fischthal & R.E. Kuntz				J.H. Fischthal & R.E. Kuntz				J.H. Fischthal & R.E. Kuntz				J.H. Fischthal & R.E. Kuntz				-				-
Date collected	1952-09-06				1952-09-06				1952-09-06				1953-08-01				1953-08-01				1953-08-01				1953-08-01				1953-08-01				1952				-
Date identified	1962-02-08				1962-02-08				1962-02-08				1963-01-01				1963-01-01				1963-01-01				1963-01-01				1963-01-01				1959				1969
Location	Giza Fish Market, Cairo, Egypt				Giza Fish Market, Cairo, Egypt				Giza Fish Market, Cairo, Egypt				Giza Fish Market, Cairo, Egypt				Giza Fish Market, Cairo, Egypt				Giza Fish Market, Cairo, Egypt				Giza Fish Market, Cairo, Egypt				Giza Fish Market, Cairo, Egypt				Giza Fish Market, Cairo, Egypt				Lake Volta, Black and White Volta Confluence, Ghana
GPS	N 30° 05’ E 31° 12’				N 30° 05’ E 31° 12’				N 30° 05’ E 31° 12’				N 30° 05’ E 31° 12’				N 30° 05’ E 31° 12’				N 30° 05’ E 31° 12’				N 30° 05’ E 31° 12’				N 30° 05’ E 31° 12’				N 30° 05’ E 31° 12’				-
Site	-				-				-				-				-				-				-				-				Gills				Gills
Host family	Cyprinidae				Cyprinidae				Cyprinidae				Cyprinidae				Cyprinidae				Cyprinidae				Cyprinidae				Cyprinidae				Cyprinidae				Cyprinidae
Host	Labeo forskalii Rüppell, 1835				Labeo forskalii Rüppell, 1835				Labeo forskalii Rüppell, 1835				Labeo forskalii Rüppell, 1835				Labeo forskalii Rüppell, 1835				Labeo forskalii Rüppell, 1835				Labeo forskalii Rüppell, 1835				Labeo forskalii Rüppell, 1835				Labeo forskalii Rüppell, 1835				Labeo coubie Rüppell, 1832
Recorded as	-				-				-				-				-				-				-				-				-				Labeo cubie
Record	Fischthal & Kuntz (1963)				Fischthal & Kuntz (1963)				Fischthal & Kuntz (1963)				Fischthal & Kuntz (1963)				Fischthal & Kuntz (1963)				Fischthal & Kuntz (1963)				Fischthal & Kuntz (1963)				Fischthal & Kuntz (1963)				Fischthal & Kuntz (1963)				Paperna (1969)
Remarks	AFA, Haematoxylin/paracarmine, Canada balsam				AFA, Haematoxylin/carmine, Canada balsam				AFA, Haematoxylin/carmine, Canada balsam				AFA, Haematoxylin/paracarmine, Canada balsam****				AFA, Haematoxylin/paracarmine, Canada balsam****				AFA, Haematoxylin/paracarmine, Canada balsam****				AFA, Haematoxylin/paracarmine, Canada balsam****				AFA, Haematoxylin/paracarmine, Canada balsam****				AFA, Haematoxylin/paracarmine, Canada balsam****				-
Total body length	4835.56	5298.31			3721.88	3642.49			4178.58	4182.44				6151.36			4470.04				4808.38	5024.2			3929.29								3700.89	3634.64			4594.17	4351.99			5062 (4836–5298)	2	4257 (3635–6151)	11	4372 (3635–6151)	13	4471 (4352–4594)	2
Anterior length	3228.04	3446.11			2177.9	2165.05			2594.78	2708.1				3828.35			3025.44				2943.27	3048.81			2603.04	2191.12			2462.58	2419.04			2055.7	1920.57			2508.65	2537.7			3335 (3228–3446)	2	2539 (1921–3828)	14	2627 (1921–3828)	16	2523 (2509–2538)	2
Anterior width	823.15	769.02			558.83	483.67			407.88	544.45			913.98	925.18			706.77	832.75			724.86	630.27			468.12	520.05			476.93	431.91			324.56	304.98			821.38	993.13			796 (769–823)	2	549 (305–925)	16	572 (305–925)	18	903 (821–993)	2
Posterior length	1607.52	1241.95			1037.88	1027.85			1015.78	853.24			1839.82	1134.56			901.66	838.64			1030.04	1049.76			883.4								1040.84	1002.32			1200.36	972.38			1413 (1242–1608)	2	1029 (839–1840)	13	1074 (839–1840)	15	1080 (972–1200)	2
Posterior width	197.67	256.7			206.96	256.71							249.74	214.39			172.75	119.97			235.42	232.38			158.04	130			145.62				127.49	138.26			176.67	190.81			225 (198–257)	2	177 (120–257)	13	183 (120–257)	15	184 (177–191)	2
Clamps length	74.27				77.55				73.55				74.71				71.33				71.81				68.18								68.78				51.68				74.2 (69.4–78.3)	13	72.3 (55.7–85.4)	104	72.5 (55.7–85.4)	117	51.5 (43.7–63.1)	16
Clamps width	93.74				104.71				-				101.97				89.85				97.61												84.28				77.07				93.4 (80–106)	9	98.9 (73.2–120)	44	97.9 (73.2–120)	53	76.9 (64.4–82.5)	16
Hook length	18.88		19		18.12				18.85				17.57	17.67	19.6						19.72				18.37				-				18.25	18.51	19.13		18.2				18.9 (18.9–19)	2	18.6 (17.6–19.7)	10	18.6 (17.6–19.7)	12	18.2	1
Handle	46.11	45.48	46.96		41.96								47.87	41.05											-				-				44.12		45.96						46.2 (45.5–47)	3	44.1 (41.1–47.9)	5	44.9 (41.1–47.9)	8	-	0
Haptor length	325.33	335.88			329.01	316.1			325.63	330.67			346.37	412.06			313.59	306.44			362.92	361.95			306.05				-				316.25	281.28			365.19	326.44			331 (325–336)	2	330 (281–412)	13	330 (281–412)	15	345 (326–365)	2
Haptor width	393.89	276.07			352.8	398.55			188.61	200.52			336.8	295.91			222.41	246.95			277.36	260.91			228.89				-				244.09	227.8			269.16	274.19			330 (276–394)	2	262 (189–399)	13	270 (189–399)	15	272 (269–274)	2
Fusion Region length	441.71				319.6				453.59				458.97				356.97				450.76				419.99				451.63				335.99				460.8				442	1	402 (320–459)	8	406 (320–459)	9	461	1
Fusion Region width	1086.55				733.63				882.64				1098				800.44				1036.13				732.95				772.37				835.02				1145.93				1087	1	852 (733–1098)	8	876 (733–1098)	9	1146	1
Space between suckers	-				-				-		8.71		12.6		4.45		-				11.49		10.67		10.04		12.31		6.92		7.08		-		-		14.75		6.21		-	0	8.93 (4.45–12.6)	9	8.93 (4.45–12.6)	9	9.57 (6.21–14.8)	2
Sucker length	115.58	118.57	125.84	122.18	126.4	127.79	127.22	122.3	94.56	89.83	89.71	85.44	125.94	118.88	106.54	106.67	92.98	94.57			120.82	119.12	117.07	116.64	108.45	107.07	100.81	101.52	102.6	105.77	82.92	82.98	100.45	102.92	91.95	95.88	67.86	70.36	78.75	78.97	120 (116–126)	4	105 (82.9–128)	30	106 (82.9–128)	34	73.8 (67.9–79)	4
Sucker width	87.37	93.73	87.31	91.16	122.17	119.62	112.94	117.5	86.42	87.41	75.46	75.87	100.65	101.95	94.34	99.04	82.95	81.91			104.56	104.99	112.89	110.06	99.41	96.15	95.26	91.94	102.23	95.61	81.45	83.37	94.14	90.12	88.12	90.73	76.69	79.52	80.01	78.9	89.9 (87.3–93.7)	4	95.9 (75.5–122)	30	95.1 (75.5–122)	34	78.8 (76.7–80)	4
Sucker to anterior	48.95		44.41		44.46		42.07		36.15		33.59		46.68		40.89		29.08				47.45		48.89		36.61		29.02		34.45		27.09			29.02		31.56	21.14		21.24		46.6 (44.4–49)	2	36.4 (27.1–48.9)	15	37.5 (27.1–49)	17	21.2 (21.1–21.2)	2
Pharynx length	71.17		71.24		65.7		64.89		55.87		51.79		80.86		83.22		73.93				66.09		60.66		55.96		59.74		59.88		58.13			52.86		53.79	51.17		72.75		71.2 (71.2–71.2)	2	62.2 (51.8–83.2)	15	63.2 (51.8–83.2)	17	61 (51.2–72.8)	2
Pharynx width	47.56		45.43		45.5		45.29		41.44		40.37		50.29		48.31		40.38				42.07		42.8		43.55		42.83		40.7		41.54			40.85		39.06	46.82		56.5		46.5 (45.4–47.6)	2	42.9 (39.1–50.3)	15	43.3 (39.1–50.3)	17	51.4 (46.8–56.5)	2
Prepharynx length	22.17		25.1		29.47		29.39		27.49		18.2		26.28		24.78		23.27				31.86		27.41		31.28		32.8		13.78		21.24			27.62		24.75	15.85		16.01		23.6 (22.2–25.1)	2	25.4 (13.8–32.8)	15	25.2 (13.8–32.8)	17	15.9 (15.9–16)	2
Egg length	298.42	298.36			-				284.68	272.66			308.36	299.92			297.97	256.97			290.71	296.56			239.16	248.44			268.43	261.27			293.58				305.04				298 (298–298)	2	278 (239–308)	13	280 (239–308)	15	305	1
Egg W	122.15	131.96			-				91.31	84.56			109.18	84.95			103.57	120.17			109.91	85.88			120.67	-			102.95	93.41			107.07				114.32				127 (122–132)	2	100.4 (84.6–121)	12	104 (84.6–132)	14	114	1
Anoperculum	166.93	166.71			-				158.42	178.28			188.89	163.12			177.13	178.77			165.24	183.05			156.84	148.8			172.9	165.18			190.74				182.75				167 (167–167)	2	171 (149–191)	13	170 (149–191)	15	183	1
Testes length	140.84	103.7			128.33		154.82		129.03	154.87			-	-			124.25	105.66			187.22	182.75			100.87	135.79			103.9				99.89	100.79			124.82				121 (104–141)	2	128 (100–187)	13	127 (100–187)	15	125	1
Testes width	73.74	89.13			94.66		87.61		89.41	93.94			-	-			81.88	69.02			88.17	90.56			74.78	63.44			88.41				84.73	67.53			106.91				81.1 (73.7–89.1)	2	82 (63.4–94.7)	13	81.8 (63.4–94.7)	15	107	1
Ovary length	444.31	341.65			257.05		268.85		292.9	395.1			-	-			317.09	359.9			470.48	469.95			296.21	279.1			339.3				302.75				422.97				390 (342–444)	2	331 (257–470)	12	339 (257–470)	14	423	1
Ovary width	220.67	145.44			121.31		131.23		179.71	155.53			-	-			162.03	198.67			224.84	166.4			145.95	137.06			175.92				193.37				296.63				179 (145–221)	2	163 (121–225)	12	166 (121–225)	14	297	1
Clamp 1 length	72.15	71.99	71.76	73.51	84.8	74.98	70.28	78.54	65.54	65.09	66.98	73.24	68.5	65.24	76.5	67.98	61.65	61.6	64.04	71.23	70.98	72.66	70.4	64.58	64.67	65.78			-				67.82	63.94	62.27	65.43	43.65	48.48	45.22	46.26	72.3 (71.8–73.5)	4	68.4 (61.6–84.8)	26	68.9 (61.6–84.8)	30	45.9 (43.7–48.5)	4
Clamp 1 width	94.56	96.26	79.99		91.88	103.68	93.88	82.7					85.57	91.18		89.71		83.67				90.36		89.5					-						73.17		75.8	64.36	68.46	70.23	90 (80–96.3)	3	88.4 (73.2–104)	11	88.7 (73.2–104)	14	69.6 (64.4–75.8)	4
Clamp 2 length	69.36	76.83	76.01	78.33	78.4	78.6	78.76	72.97	78.19	65.43	73.5	74.31	80.41	79.7	79.22	68.02	69.77	74.67	71.09	81.06	71.42	69.98	72.38	75.41	72.69	68.21			-				67.35	74.82	63.21	72.97	50.61	54.09	52.05	51.46	75.1 (69.4–78.3)	4	73.4 (63.2–81.1)	26	73.6 (63.2–81.1)	30	52 (50.6–54.1)	4
Clamp 2 width	98.43	105.87	83.65		107.49	116.29	108.56	98.95					101.22	112.54		99.77		91.54				103.4		105.11					-						82.41		82.51	78.77	76.6	82.5	95.5 (83.7–106)	3	102.1 (82.4–116)	11	100.6 (82.4–116)	14	80.1 (76.6–82.5)	4
Clamp 3 length		73.84	71.89	75.95	78.89	82.09	75.35	71.33	78.4	79.18	80.87	72.82	82.45	81.02	78.81	68.09	68.16	70.58	74.73	79.08	73.65	70.32	72.31	78.89	67.94	68.53			-				71.99	70.85	58.27	79.83	56.97	50.33	56.66	51.25	73.9 (71.9–76)	3	74.2 (58.3–82.5)	26	74.1 (58.3–82.5)	29	53.7 (50.3–57)	4
Clamp 3 width		98.32	94.29		106.39	119.98	114.87	103.21					103.36	110.56		105.88		88.04				97.35		107.01					-						94.42		81.79	80.79	79.5	81.18	96.3 (94.3–98.3)	2	104.3 (88–120)	11	103 (88–120)	13	80.8 (79.5–81.8)	4
Clamp 4 length			76.2	77.63	81.33	85.43	78.06	71.06	78.54	77.65	77.91	69.13	80.54	70.51	77.1	71.29	67.5	70.32	78.15	77.65	73.53	61.71	73.57	77.1	70.21	67.43			-				74.34	70.09	55.7	81.53	63.09	49.99	57.86	48.93	76.9 (76.2–77.6)	2	73.5 (55.7–85.4)	26	73.7 (55.7–85.4)	28	54.7 (48.9–63.1)	4
Clamp 4 width			92.28		103.15	116.85	112.5	94.94					105.95	113.23		104.63		96.13				93.23		94.88					-						87.11		77.86	78.29	77.2	77.33	92.3	1	101.6 (87.1–117)	11	100.8 (87.1–117)	12	77.7 (77.2–78.3)	4

## Sheet: USNM 1355449
	Paradiplozoon aegyptense (Fischtal & Kuntz, 1963)
	USNM 1355449
Alternate	USNPC # 059653
Collection name	SNMNH
Previous collection	US National Parasite Collection
Recorded as	Diplozoon aegyptensis Fischtal & Kuntz, 1963
Status	Holotype*
Specimen	1 Adult
Collector	R.E. Kuntz
Identified by	J.H. Fischthal & R.E. Kuntz
Date collected	1952-09-06
Date identified	1962-02-08
Location	Giza Fish Market, Cairo, Egypt
GPS	N 30° 05’ E 31° 12’
Site	-
Host family	Cyprinidae
Host	Labeo forskalii Rüppell, 1835
Recorded as	-
Record	Fischthal & Kuntz (1963)
Remarks	AFA, Haematoxylin/paracarmine, Canada balsam
Total body length	4835.56	5298.31
Anterior length	3228.04	3446.11
Anterior width	823.15	769.02
Posterior length	1607.52	1241.95
Posterior width	197.67	256.7
Clamps length	74.27
Clamps width	93.74
Hook length	18.88		19
Handle	46.11	45.48	46.96
Haptor length	325.33	335.88
Haptor width	393.89	276.07
Fusion Region length	441.71
Fusion Region width	1086.55
Space between suckers	-
Sucker length	115.58	118.57	125.84	122.18
Sucker width	87.37	93.73	87.31	91.16
Sucker to anterior	48.95		44.41
Pharynx length	71.17		71.24
Pharynx width	47.56		45.43
Prepharynx length	22.17		25.1
Egg length	298.42	298.36
Egg W	122.15	131.96
Anoperculum	166.93	166.71
Testes length	140.84	103.7
Testes width	73.74	89.13
Ovary length	444.31	341.65
Ovary width	220.67	145.44
Clamp 1 length	72.15	71.99	71.76	73.51
Clamp 1 width	94.56	96.26	79.99
Clamp 2 length	69.36	76.83	76.01	78.33
Clamp 2 width	98.43	105.87	83.65
Clamp 3 length		73.84	71.89	75.95
Clamp 3 width		98.32	94.29
Clamp 4 length			76.2	77.63
Clamp 4 width			92.28

## Sheet: USNM 1355450.1
	Paradiplozoon aegyptense (Fischtal & Kuntz, 1963)
	USNM 1355450.1
Alternate	USNPC # 059654
Collection name	SNMNH
Previous collection	US National Parasite Collection
Recorded as	Diplozoon aegyptensis Fischtal & Kuntz, 1963
Status	Paratypes
Specimen	2 Adults
Collector	R.E. Kuntz
Identified by	J.H. Fischthal & R.E. Kuntz
Date collected	1952-09-06
Date identified	1962-02-08
Location	Giza Fish Market, Cairo, Egypt
GPS	N 30° 05’ E 31° 12’
Site	-
Host family	Cyprinidae
Host	Labeo forskalii Rüppell, 1835
Recorded as	-
Record	Fischthal & Kuntz (1963)
Remarks	AFA, Haematoxylin/carmine, Canada balsam
Total body length	3721.88	3642.49
Anterior length	2177.9	2165.05
Anterior width	558.83	483.67
Posterior length	1037.88	1027.85
Posterior width	206.96	256.71
Clamps length	77.55
Clamps width	104.71
Hook length	18.12
Handle	41.96
Haptor length	329.01	316.1
Haptor width	352.8	398.55
Fusion Region length	319.6
Fusion Region width	733.63
Space between suckers	-
Sucker length	126.4	127.79	127.22	122.3
Sucker width	122.17	119.62	112.94	117.5
Sucker to anterior	44.46		42.07
Pharynx length	65.7		64.89
Pharynx width	45.5		45.29
Prepharynx length	29.47		29.39
Egg length	-
Egg W	-
Anoperculum	-
Testes length	128.33		154.82
Testes width	94.66		87.61
Ovary length	257.05		268.85
Ovary width	121.31		131.23
Clamp 1 length	84.8	74.98	70.28	78.54
Clamp 1 width	91.88	103.68	93.88	82.7
Clamp 2 length	78.4	78.6	78.76	72.97
Clamp 2 width	107.49	116.29	108.56	98.95
Clamp 3 length	78.89	82.09	75.35	71.33
Clamp 3 width	106.39	119.98	114.87	103.21
Clamp 4 length	81.33	85.43	78.06	71.06
Clamp 4 width	103.15	116.85	112.5	94.94

## Sheet: USNM 1355450.2
	Paradiplozoon aegyptense (Fischtal & Kuntz, 1963)
	USNM 1355450.2
Alternate	USNPC # 059654
Collection name	SNMNH
Previous collection	US National Parasite Collection
Recorded as	Diplozoon aegyptensis Fischtal & Kuntz, 1963
Status	Paratypes
Specimen	2 Adults
Collector	R.E. Kuntz
Identified by	J.H. Fischthal & R.E. Kuntz
Date collected	1952-09-06
Date identified	1962-02-08
Location	Giza Fish Market, Cairo, Egypt
GPS	N 30° 05’ E 31° 12’
Site	-
Host family	Cyprinidae
Host	Labeo forskalii Rüppell, 1835
Recorded as	-
Record	Fischthal & Kuntz (1963)
Remarks	AFA, Haematoxylin/carmine, Canada balsam
Total body length	4178.58	4182.44
Anterior length	2594.78	2708.1
Anterior width	407.88	544.45
Posterior length	1015.78	853.24
Posterior width
Clamps length	73.55
Clamps width	-
Hook length	18.85
Handle
Haptor length	325.63	330.67
Haptor width	188.61	200.52
Fusion Region length	453.59
Fusion Region width	882.64
Space between suckers	-		8.71
Sucker length	94.56	89.83	89.71	85.44
Sucker width	86.42	87.41	75.46	75.87
Sucker to anterior	36.15		33.59
Pharynx length	55.87		51.79
Pharynx width	41.44		40.37
Prepharynx length	27.49		18.2
Egg length	284.68	272.66
Egg W	91.31	84.56
Anoperculum	158.42	178.28
Testes length	129.03	154.87
Testes width	89.41	93.94
Ovary length	292.9	395.1
Ovary width	179.71	155.53
Clamp 1 length	65.54	65.09	66.98	73.24
Clamp 1 width
Clamp 2 length	78.19	65.43	73.5	74.31
Clamp 2 width
Clamp 3 length	78.4	79.18	80.87	72.82
Clamp 3 width
Clamp 4 length	78.54	77.65	77.91	69.13
Clamp 4 width

## Sheet: USNM1363700.1
	Paradiplozoon aegyptense (Fischtal & Kuntz, 1963)
	USNM 1363700.1
Alternate	USNPC # 068090
Collection name	SNMNH
Previous collection	US National Parasite Collection
Recorded as	Diplozoon aegyptensis Fischtal & Kuntz, 1963
Status	Paratypes
Specimen	5 Adults
Collector	R.E. Kuntz
Identified by	J.H. Fischthal & R.E. Kuntz
Date collected	1953-08-01
Date identified	1963-01-01
Location	Giza Fish Market, Cairo, Egypt
GPS	N 30° 05’ E 31° 12’
Site	-
Host family	Cyprinidae
Host	Labeo forskalii Rüppell, 1835
Recorded as	-
Record	Fischthal & Kuntz (1963)
Remarks	AFA, Haematoxylin/paracarmine, Canada balsam****
Total body length		6151.36
Anterior length		3828.35
Anterior width	913.98	925.18
Posterior length	1839.82	1134.56
Posterior width	249.74	214.39
Clamps length	70.32
Clamps width	94.12
Hook length	17.57	17.67	19.6
Handle	47.87	41.05
Haptor length	346.37	412.06
Haptor width	336.8	295.91
Fusion Region length	458.97
Fusion Region width	1098
Space between suckers	12.6		4.45
Sucker length	125.94	118.88	106.54	106.67
Sucker width	100.65	101.95	94.34	99.04
Sucker to anterior	46.68		40.89
Pharynx length	80.86		83.22
Pharynx width	50.29		48.31
Prepharynx length	26.28		24.78
Egg length	308.36	299.92
Egg W	109.18	84.95
Anoperculum	188.89	163.12
Testes length	-	-
Testes width	-	-
Ovary length	-	-
Ovary width	-	-
Clamp 1 length	68.5	65.24	76.5	67.98
Clamp 1 width	85.57	91.18		89.71
Clamp 2 length	80.41	79.7	79.22	68.02
Clamp 2 width	101.22	112.54		99.77
Clamp 3 length	82.45	81.02	78.81	68.09
Clamp 3 width	103.36	110.56		105.88
Clamp 4 length	80.54	70.51	77.1	71.29
Clamp 4 width	105.95	113.23		104.63

## Sheet: USNM1363700.2
	Paradiplozoon aegyptense (Fischtal & Kuntz, 1963)
	USNM 1363700.2
Alternate	USNPC # 068090
Collection name	SNMNH
Previous collection	US National Parasite Collection
Recorded as	Diplozoon aegyptensis Fischtal & Kuntz, 1963
Status	Paratypes
Specimen	5 Adults
Collector	R.E. Kuntz
Identified by	J.H. Fischthal & R.E. Kuntz
Date collected	1953-08-01
Date identified	1963-01-01
Location	Giza Fish Market, Cairo, Egypt
GPS	N 30° 05’ E 31° 12’
Site	-
Host family	Cyprinidae
Host	Labeo forskalii Rüppell, 1835
Recorded as	-
Record	Fischthal & Kuntz (1963)
Remarks	AFA, Haematoxylin/paracarmine, Canada balsam****
Total body length	4470.04
Anterior length	3025.44
Anterior width	706.77	832.75
Posterior length	901.66	838.64
Posterior width	172.75	119.97
Clamps length	71.33
Clamps width	89.85
Hook length	-
Handle	-
Haptor length	313.59	306.44
Haptor width	222.41	246.95
Fusion Region length	356.97
Fusion Region width	800.44
Space between suckers	-
Sucker length	92.98	94.57
Sucker width	82.95	81.91
Sucker to anterior	29.08
Pharynx length	73.93
Pharynx width	40.38
Prepharynx length	23.27
Egg length	297.97	256.97
Egg W	103.57	120.17
Anoperculum	177.13	178.77
Testes length	124.25	105.66
Testes width	81.88	69.02
Ovary length	317.09	359.9
Ovary width	162.03	198.67
Clamp 1 length	61.65	61.6	64.04	71.23
Clamp 1 width		83.67
Clamp 2 length	69.77	74.67	71.09	81.06
Clamp 2 width		91.54
Clamp 3 length	68.16	70.58	74.73	79.08
Clamp 3 width		88.04
Clamp 4 length	67.5	70.32	78.15	77.65
Clamp 4 width		96.13

## Sheet: USNM1363700.3
	Paradiplozoon aegyptense (Fischtal & Kuntz, 1963)
	USNM 1363700.3
Alternate	USNPC # 068090
Collection name	SNMNH
Previous collection	US National Parasite Collection
Recorded as	Diplozoon aegyptensis Fischtal & Kuntz, 1963
Status	Paratypes
Specimen	5 Adults
Collector	R.E. Kuntz
Identified by	J.H. Fischthal & R.E. Kuntz
Date collected	1953-08-01
Date identified	1963-01-01
Location	Giza Fish Market, Cairo, Egypt
GPS	N 30° 05’ E 31° 12’
Site	-
Host family	Cyprinidae
Host	Labeo forskalii Rüppell, 1835
Recorded as	-
Record	Fischthal & Kuntz (1963)
Remarks	AFA, Haematoxylin/paracarmine, Canada balsam****
Total body length	4808.38	5024.2
Anterior length	2943.27	3048.81
Anterior width	724.86	630.27
Posterior length	1030.04	1049.76
Posterior width	235.42	232.38
Clamps length	71.81
Clamps width	97.61
Hook length	19.72
Handle	-
Haptor length	362.92	361.95
Haptor width	277.36	260.91
Fusion Region length	450.76
Fusion Region width	1036.13
Space between suckers	11.49		10.67
Sucker length	120.82	119.12	117.07	116.64
Sucker width	104.56	104.99	112.89	110.06
Sucker to anterior	47.45		48.89
Pharynx length	66.09		60.66
Pharynx width	42.07		42.8
Prepharynx length	31.86		27.41
Egg length	290.71	296.56
Egg W	109.91	85.88
Anoperculum	165.24	183.05
Testes length	187.22	182.75
Testes width	88.17	90.56
Ovary length	470.48	469.95
Ovary width	247.72	166.4
Clamp 1 length	70.98	72.66	70.4	64.58
Clamp 1 width		90.36		89.5
Clamp 2 length	71.42	69.98	72.38	75.41
Clamp 2 width		103.4		105.11
Clamp 3 length	73.65	70.32	72.31	78.89
Clamp 3 width		97.35		107.01
Clamp 4 length	73.53	61.71	73.57	77.1
Clamp 4 width		93.23		94.88

## Sheet: USNM1363700.4
	Paradiplozoon aegyptense (Fischtal & Kuntz, 1963)
	USNM 1363700.4
Alternate	USNPC # 068090
Collection name	SNMNH
Previous collection	US National Parasite Collection
Recorded as	Diplozoon aegyptensis Fischtal & Kuntz, 1963
Status	Paratypes
Specimen	5 Adults
Collector	R.E. Kuntz
Identified by	J.H. Fischthal & R.E. Kuntz
Date collected	1953-08-01
Date identified	1963-01-01
Location	Giza Fish Market, Cairo, Egypt
GPS	N 30° 05’ E 31° 12’
Site	-
Host family	Cyprinidae
Host	Labeo forskalii Rüppell, 1835
Recorded as	-
Record	Fischthal & Kuntz (1963)
Remarks	AFA, Haematoxylin/paracarmine, Canada balsam****
Total body length	3929.29
Anterior length	2603.04	2191.12
Anterior width	468.12	520.05
Posterior length	883.4
Posterior width	158.04	130
Clamps length	68.18
Clamps width	-
Hook length	18.37
Handle	-
Haptor length	306.05
Haptor width	228.89
Fusion Region length	419.99
Fusion Region width	732.95
Space between suckers	10.04		12.31
Sucker length	108.45	107.07	100.81	101.52
Sucker width	99.41	96.15	95.26	91.94
Sucker to anterior	36.61		29.02
Pharynx length	55.96		59.74
Pharynx width	43.55		42.83
Prepharynx length	31.28		32.8
Egg length	239.16	248.44
Egg W	120.67	-
Anoperculum	156.84	148.8
Testes length	100.87	135.79
Testes width	74.78	63.44
Ovary length	296.21	279.1
Ovary width	145.95	137.06
Clamp 1 length	64.67	65.78
Clamp 1 width
Clamp 2 length	72.69	68.21
Clamp 2 width
Clamp 3 length	67.94	68.53
Clamp 3 width
Clamp 4 length	70.21	67.43
Clamp 4 width

## Sheet: USNM1363700.5
	Paradiplozoon aegyptense (Fischtal & Kuntz, 1963)				Paradiplozoon aegyptense (Fischtal & Kuntz, 1963)				Paradiplozoon aegyptense (Fischtal & Kuntz, 1963)
	USNM 1363700.5
Alternate	USNPC # 068090
Collection name	SNMNH
Previous collection	US National Parasite Collection
Recorded as	Diplozoon aegyptensis Fischtal & Kuntz, 1963
Status	Paratypes
Specimen	5 Adults
Collector	R.E. Kuntz
Identified by	J.H. Fischthal & R.E. Kuntz
Date collected	1953-08-01
Date identified	1963-01-01
Location	Giza Fish Market, Cairo, Egypt
GPS	N 30° 05’ E 31° 12’
Site	-
Host family	Cyprinidae
Host	Labeo forskalii Rüppell, 1835
Recorded as	-
Record	Fischthal & Kuntz (1963)
Remarks	AFA, Haematoxylin/paracarmine, Canada balsam****
Total body length
Anterior length	2462.58	2419.04
Anterior width	476.93	431.91
Posterior length
Posterior width	145.62
Clamps length	-
Clamps width	-
Hook length	-
Handle	-
Haptor length	-
Haptor width	-
Fusion Region length	451.63
Fusion Region width	772.37
Space between suckers	6.92		7.08
Sucker length	102.6	105.77	82.92	82.98
Sucker width	102.23	95.61	81.45	83.37
Sucker to anterior	34.45		27.09
Pharynx length	59.88		58.13
Pharynx width	40.7		41.54
Prepharynx length	13.78		21.24
Egg length	268.43	261.27
Egg W	102.95	93.41
Anoperculum	172.9	165.18
Testes length	103.9
Testes width	88.41
Ovary length	339.3
Ovary width	175.92
Clamp 1 length	-
Clamp 1 width	-
Clamp 2 length	-
Clamp 2 width	-
Clamp 3 length	-
Clamp 3 width	-
Clamp 4 length	-
Clamp 4 width	-

## Sheet: RMCA_VERMES_35196
	Paradiplozoon aegyptense (Fischtal & Kuntz, 1963)
	RMCA_VERMES_35196
Alternate	M.T. 35.196
Collection name	RMCA
Previous collection	-
Recorded as	Diplozoon aegyptensis (Fischtal & Kuntz, 1963)
Status	Paratype**
Specimen	1 Adult
Collector	J.H. Fischthal
Identified by	-
Date collected	1952
Date identified	1959
Location	Giza Fish Market, Cairo, Egypt
GPS	N 30° 05’ E 31° 12’
Site	Gills
Host family	Cyprinidae
Host	Labeo forskalii Rüppell, 1835
Recorded as	-
Record	Fischthal & Kuntz (1963)
Remarks	AFA, Haematoxylin/paracarmine, Canada balsam****
Total body length	3700.89	3634.64
Anterior length	2055.7	1920.57
Anterior width	324.56	304.98
Posterior length	1040.84	1002.32
Posterior width	127.49	138.26
Clamps length	68.78
Clamps width	84.28
Hook length	18.25	18.51	19.13
Handle	44.12		45.96
Haptor length	316.25	281.28
Haptor width	244.09	227.8
Fusion Region length	335.99
Fusion Region width	835.02
Space between suckers	-		-
Sucker length	100.45	102.92	91.95	95.88
Sucker width	94.14	90.12	88.12	90.73
Sucker to anterior		29.02		31.56
Pharynx length		52.86		53.79
Pharynx width		40.85		39.06
Prepharynx length		27.62		24.75
Egg length	293.58
Egg W	107.07
Anoperculum	190.74
Testes length	99.89	100.79
Testes width	84.73	67.53
Ovary length	302.75
Ovary width	193.37
Clamp 1 length	67.82	63.94	62.27	65.43
Clamp 1 width			73.17
Clamp 2 length	67.35	74.82	63.21	72.97
Clamp 2 width			82.41
Clamp 3 length	71.99	70.85	58.27	79.83
Clamp 3 width			94.42
Clamp 4 length	74.34	70.09	55.7	81.53
Clamp 4 width			87.11

[truncated: 1 more sheets: RMCA_VERMES_35580]
